# Supplementary material
Source: Research Square preprint supplement (doi:10.21203/rs.3.rs-9923053/v1)
Supplement: Supplementary file 1 [file 767269343fd842c5c5fcf736.docx]

Based on the figure and the information provided in the original text [1], we performed the following mathematical extrapolation. First, the graph depicts a stepwise survival curve(Fig.1), specifically a Kaplan–Meier survival curve [2], which can be expressed as a piecewise function.

Note: *S(t)* represents the survival rate at time *t* (days), corresponding to the vertical coordinate of the KP-O curve.

Based on the survival curve and the piecewise function, we can determine time points such as 15, 18, 20, 22, and 24 days, with the calculations as follows:

（≥24）…

⟹ .

where = specific time point of the -th endpoint event (death), = number of events at , and = number of mice at risk immediately before .
