# Supplementary material
Source: Research Square preprint supplement (doi:10.21203/rs.3.rs-9923053/v1)
Supplement: Supplementary file 2 [file fd319d6733214d5cd1b67562.docx]

|  | | | |
| --- | --- | --- | --- |
| Time t (days) | Number of events d | Number at risk n | Survival rate |
| 0 | 0 | 11 | 100% |
| 15 | 1 | 11 | ≈90.9% |
| 18 | 1 | 10 | ≈81.8% |
| 20 | 3 | 9 | ≈54.5% |
| 22 | 1 | 6 | ≈45.5% |
| 24 | 2 | 5 | ≈27.3% |
| 28 | 1 | 3 | ≈18.2% |
| 35 | 1 | 2 | ≈9.1% |
| 50 | 1 | 1 | 0% |
